# Supplementary material for: Incorporation of globally available datasets into the roving cosmic-ray neutron probe method for estimating field-scale soil water content
Source: Copernicus journal article supplement (doi:10.5194/hess-20-3859-2016), 2016-09-19
Supplement: Supplementary file 1 [file hess-20-3859-2016-supplement.zip]

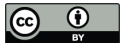

## *Supplement of*

# **Incorporation of globally available datasets into the roving cosmic-ray neutron probe method for estimating field-scale soil water content**

**William Alexander Avery et al.**

*Correspondence to:* Trenton E. Franz (tfranz2@unl.edu)

- hess-20-3859-2016-supplement-title-page.pdf
- Tables\_Supplemental\_20160301.xlsx
- \_\_MACOSX
  - .\_Tables\_Supplemental\_20160301.xlsx

The copyright of individual parts of the supplement might differ from the CC-BY 3.0 licence.
